# Supplementary material for: Top-Down Neural Attention by Excitation Backprop
Source: Springer Nature journal article supplement (doi:10.1007/s11263-017-1059-x), 2017-12-23
Supplement: 11263_2017_1059_MOESM1_ESM.pdf [file 11263_2017_1059_MOESM1_ESM.pdf]

# Supplementary Material: Top-down Neural Attention by Excitation Backprop

Jianming Zhang<sup>1,2</sup>   Sarah Adel Bargal<sup>1</sup>   Zhe Lin<sup>2</sup>   Jonathan Brandt<sup>2</sup>  
Xiaohui Shen<sup>2</sup>   Stan Sclaroff<sup>1</sup>

<sup>1</sup>Boston University   <sup>2</sup>Adobe Research

## Contents:

1. Probabilistic Winner-Take-All and Absorbing Markov Chain (Sec. 1)
2. Speed Performance (Sec. 2)
3. Pointing Game (Sec. 3)
  - (a) Classifier Training Details (Sec. 3.1)
  - (b) Per Category Performance (Sec. 3.2)
  - (c) Qualitative Evaluation (Sec. 3.3)
4. Text-to-Region Association (Sec. 4)
  - (a) Details about the Stock6M Dataset (Sec. 4.1)
  - (b) Example Word Attention Maps (Sec. 4.2)
5. Other Discussions (Sec. 5)
  - (a) Effects of the Layer Selection (Sec. 5.1)

# 1 Probabilistic Winner-Take-All and Absorbing Markov Chain

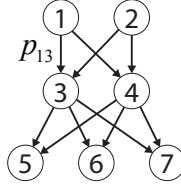

**Fig. 1.** An example Absorbing Markov Chain process in the feedforward network. The number in the circle denotes the index of the neuron.  $p_{ij} := P(a_j|a_i)$  is the transition probability from  $i$  to  $j$ .

The top-down probabilistic Winner-Take-All process in a neural network can be interpreted as an Absorbing Markov Chain process [1].

A Markov Chain is an absorbing chain if 1) there is at least one absorbing state and 2) it is possible to go from any state to at least one absorbing state in a finite number of steps. Any walk will eventually end at one of the absorbing states. Non-absorbing states are called Transient States. For an absorbing Markov Chain, the canonical form of the transition matrix  $P$  can be represented by

$$P = \begin{bmatrix} Q & R \\ \mathbf{0} & I_r \end{bmatrix}, \quad (1)$$

where the entry  $p_{ij}$  is the the transition probability from state  $i$  to  $j$ . Each row sums up to one and  $I_r$  is an  $r \times r$  **identity** matrix corresponding to the  $r$  absorbing states.

In our case, each random walk starts from an output neuron and ends at some absorbing node in the network. The neurons at the bottom layer are all absorbing nodes as they have no outgoing edges (in top-down order we invert the edges' direction in the network). An example is shown in Fig. 1. We can write down the transition matrix for this example as follows:

$$P = \begin{bmatrix} 0 & 0 & p_{13} & p_{14} & 0 & 0 & 0 \\ 0 & 0 & p_{23} & p_{24} & 0 & 0 & 0 \\ 0 & 0 & 0 & 0 & p_{35} & p_{36} & p_{37} \\ 0 & 0 & 0 & 0 & p_{45} & p_{46} & p_{47} \\ 0 & 0 & 0 & 0 & 1 & 0 & 0 \\ 0 & 0 & 0 & 0 & 0 & 1 & 0 \\ 0 & 0 & 0 & 0 & 0 & 0 & 1 \end{bmatrix}. \quad (2)$$

For a feedforward network, the corresponding transition matrix can be represented by an upper triangular matrix, as shown above. The fundamental matrix

can then be computed by

$$N = \sum_{k=0}^{\infty} Q^k = (I_t - Q)^{-1}, \quad (3)$$

where  $I_t$  is the  $t \times t$  identity matrix, and

$$Q = \begin{bmatrix} 0 & 0 & p_{13} & p_{14} \\ 0 & 0 & p_{23} & p_{24} \\ 0 & 0 & 0 & 0 \\ 0 & 0 & 0 & 0 \end{bmatrix}. \quad (4)$$

In our example,  $N$  is simply

$$N = \begin{bmatrix} 1 & 0 & p_{13} & p_{14} \\ 0 & 1 & p_{23} & p_{24} \\ 0 & 0 & 1 & 0 \\ 0 & 0 & 0 & 1 \end{bmatrix}. \quad (5)$$

The  $(i, j)$  entry of  $N$  can be interpreted as the the expected number of visits to node  $j$ , given that the walker starts at  $i$ . Let  $p_{01}$  and  $p_{02}$  denote the prior distribution over the starting node, then the expected numbers of visits to the transient nodes are

$$\begin{aligned} V &= [p_{01}, p_{02}, 0, 0]N \\ &= [p_{01}, p_{02}, p_{01}p_{13} + p_{02}p_{23}, p_{01}p_{14} + p_{02}p_{24}] \end{aligned} \quad (6)$$

for neuron 1, 2, 3 and 4 respectively. This is consistent with the definition the Marginal Winning Probability (MWP) in our formulation. The expected number of visits for absorbing nodes can also easily computed by  $V \cdot R$ .

In theory, all the hidden neuron's MWP can be computed based on the fundamental matrix, and the MWP is a linear function of the top-down signal vector. In practice, our Excitation Backprop does the computation in a layer-wise fashion, without the need to explicitly construct the fundamental matrix. This layer-wise propagation is possible due to the acyclic nature of the feedforward network.

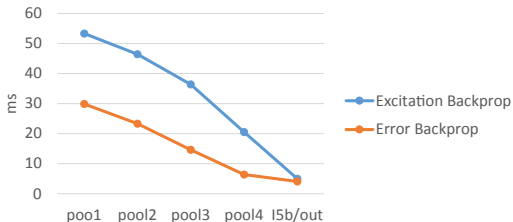

**Fig. 2.** Speed performance of our implementation of Excitation Backprop compared with error backpropagation in GPU mode. The speed is measured on a NVIDIA K40c GPU for a single 224X335 image (without using batch mode). The x-axis represents the layer at which the tested method terminates.

## 2 Speed Performance

The most time-consuming operations in Excitation Backprop are the second and fourth steps in [Alg.1 of the main manuscript](#), which correspond to the **forward** and **backward** operations of the layer in Caffe. Therefore, the computational complexity of Excitation Backprop is about twice the complexity of error backpropagation, but in practice we only perform the Excitation Backprop to some intermediate layer. The speed performance of our implementation of Excitation Backprop is reported in [Fig. 2](#) for GoogleNet.



## 3 Pointing Game

### 3.1 Classifier Training Details

To train classifiers on COCO [2] and VOC07 [3], we follow the basic fine-tuning procedure for image classification. We fine-tune the output layer of the model using the multi-label cross-entropy objective function on the training split of COCO and VOC07. Images are padded to square shape by mirror padding and up-sampled to  $256 \times 256$ . Random flipping and cropping are used for data augmentation. No multi-scale training [4] is used. We fix the learning rate to be 0.01 for all the architectures and optimize the parameters using SGD. The training batch size is set as 64, 32 and 64 for VGGs, VGG16 and GoogleNet respectively. We stop the training when the training error plateaus.

### 3.2 Per Category Performance

We report the per category accuracy using the GoogleNet classifier on COCO and VOC07 in Figs. 3 and 4 respectively. Our method c-MWP outperforms competitors in 69/80 categories on COCO and in 9/20 categories on VOC07. Our c-MWP is particularly more accurate than other methods for small objects such as `tie`, `kite`, `baseball bat`, `skateboard`, `bottle` on COCO.

### 3.3 Qualitative Evaluation

We provide qualitative attention map comparisons in Figs. 5-10 for c-MWP, CAM [5], LRP [6], Deconv [7] and Grad [8].

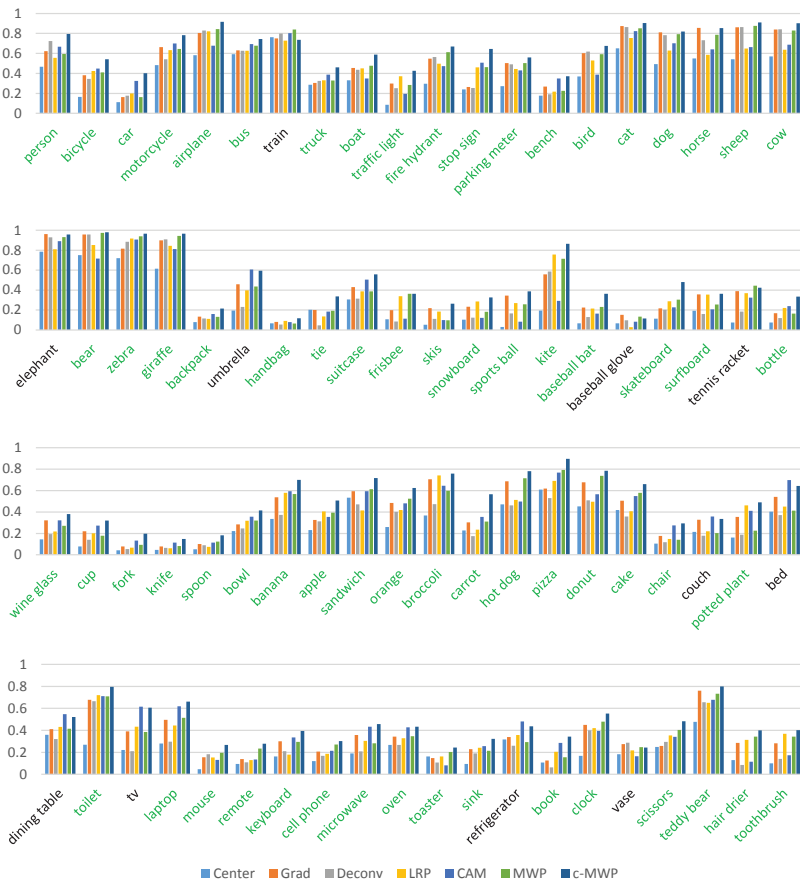

**Fig. 3.** Pointing Game: mean accuracy per category on COCO using GoogleNet. Categories where c-MWP gives the highest score are marked in green. c-MWP achieves the **best** performance in 69/80 categories.

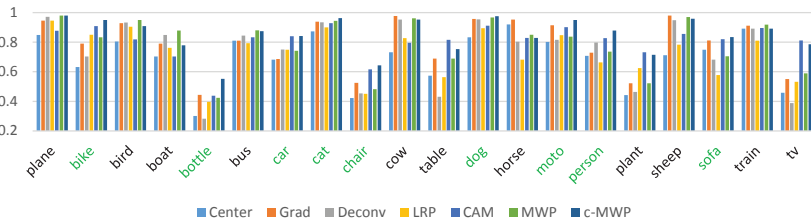

**Fig. 4.** Pointing Game: mean accuracy per category on VOC07 using GoogleNet. Categories where c-MWP gives the highest score are marked in green. c-MWP achieves the best performance in 9/20 categories.

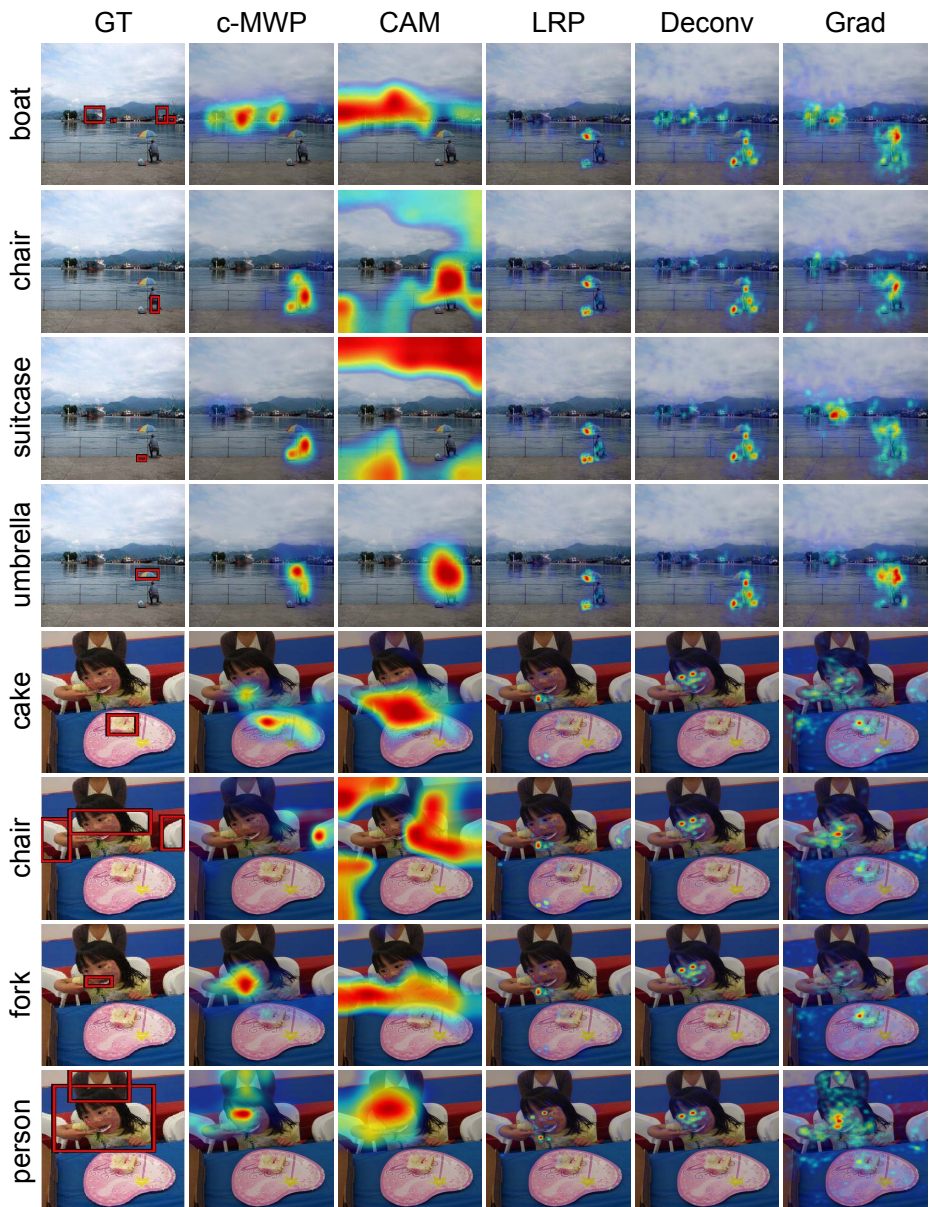

Fig. 5. Pointing Game: example attention maps using GoogleNet on COCO for c-MWP, CAM [5], LRP [6], Deconv [7] and Grad [8].

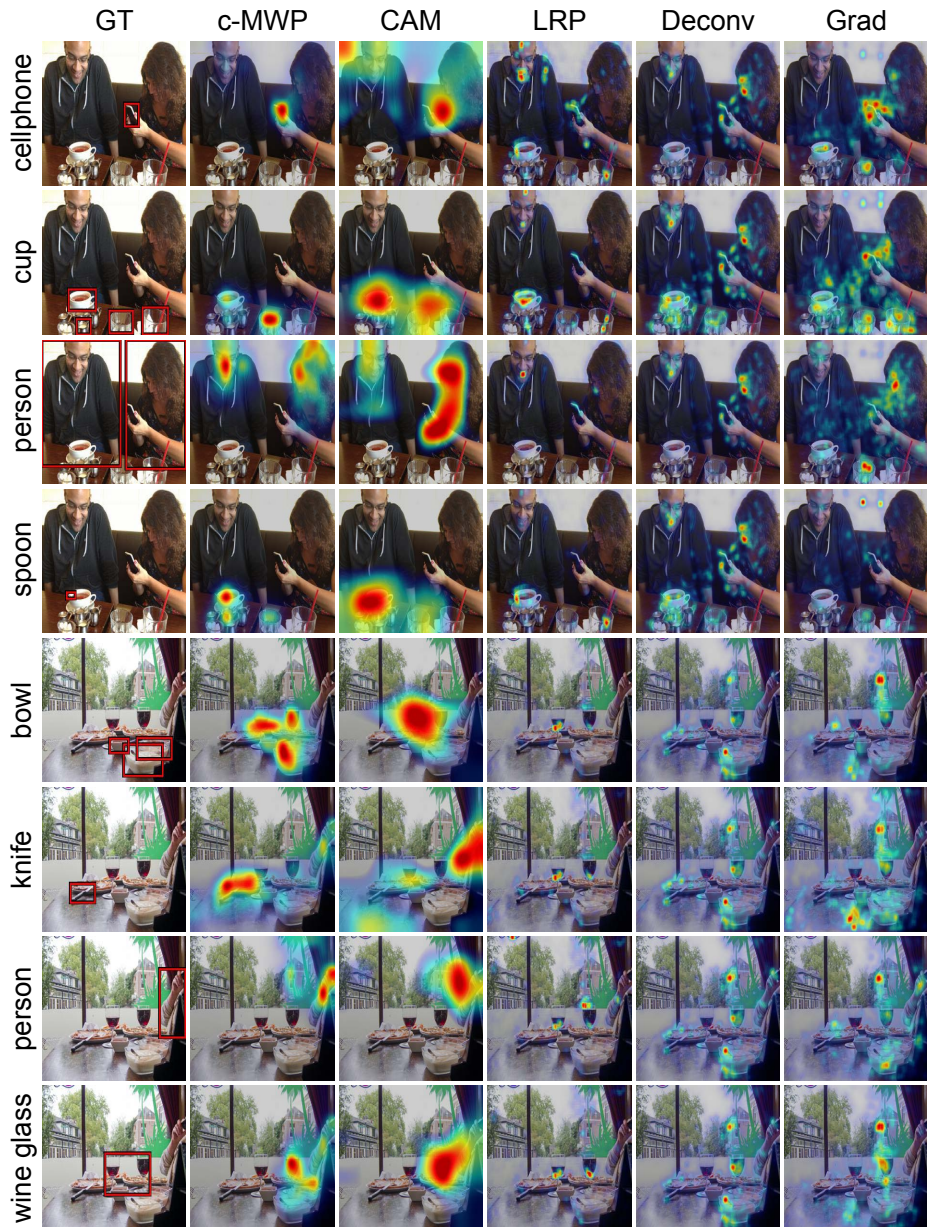

Fig. 6. Pointing Game: example attention maps using GoogleNet on COCO for c-MWP, CAM [5], LRP [6], Deconv [7] and Grad [8].



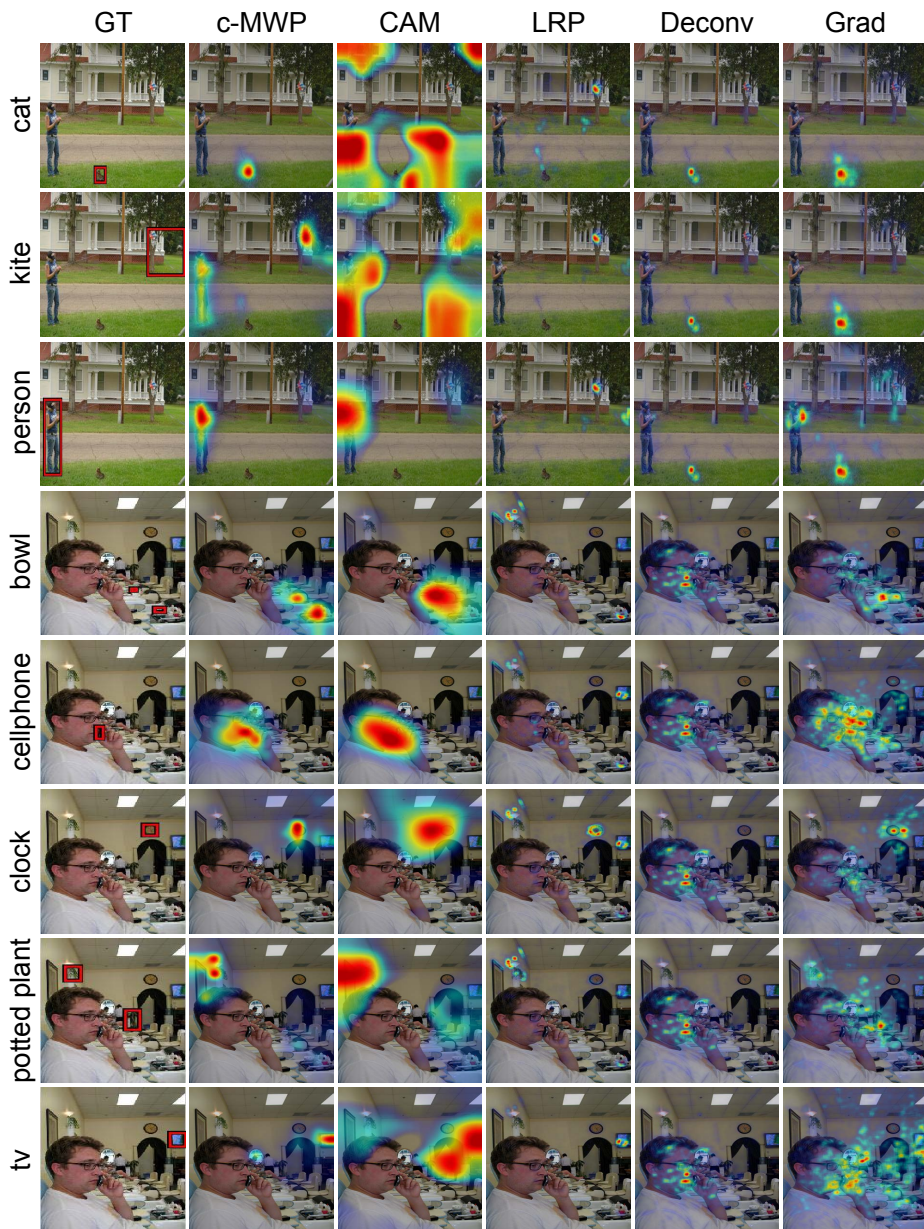

Fig. 7. Pointing Game: example attention maps using GoogleNet on COCO for c-MWP, CAM [5], LRP [6], Deconv [7] and Grad [8].

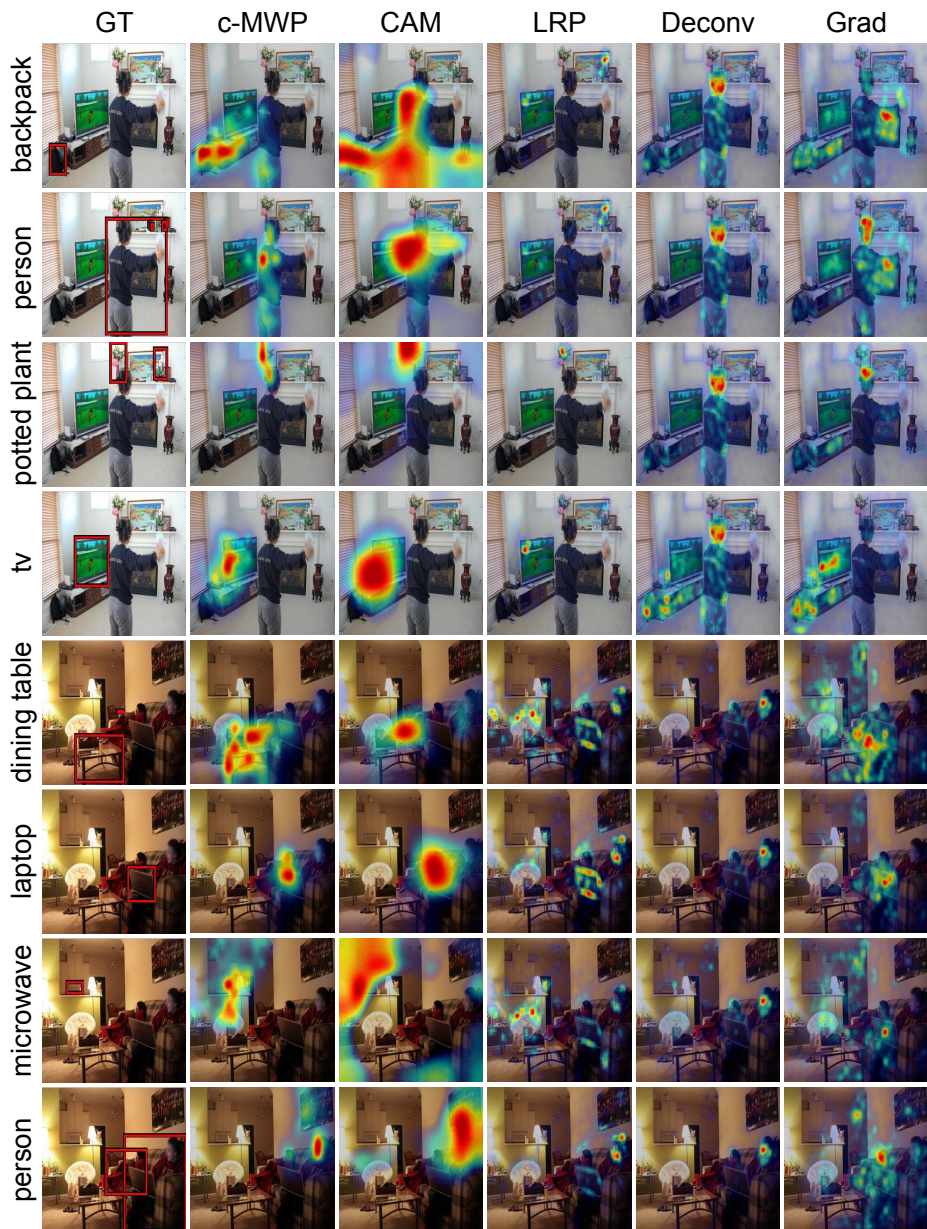

Fig. 8. Pointing Game: example attention maps using GoogleNet on COCO for c-MWP, CAM [5], LRP [6], Deconv [7] and Grad [8].



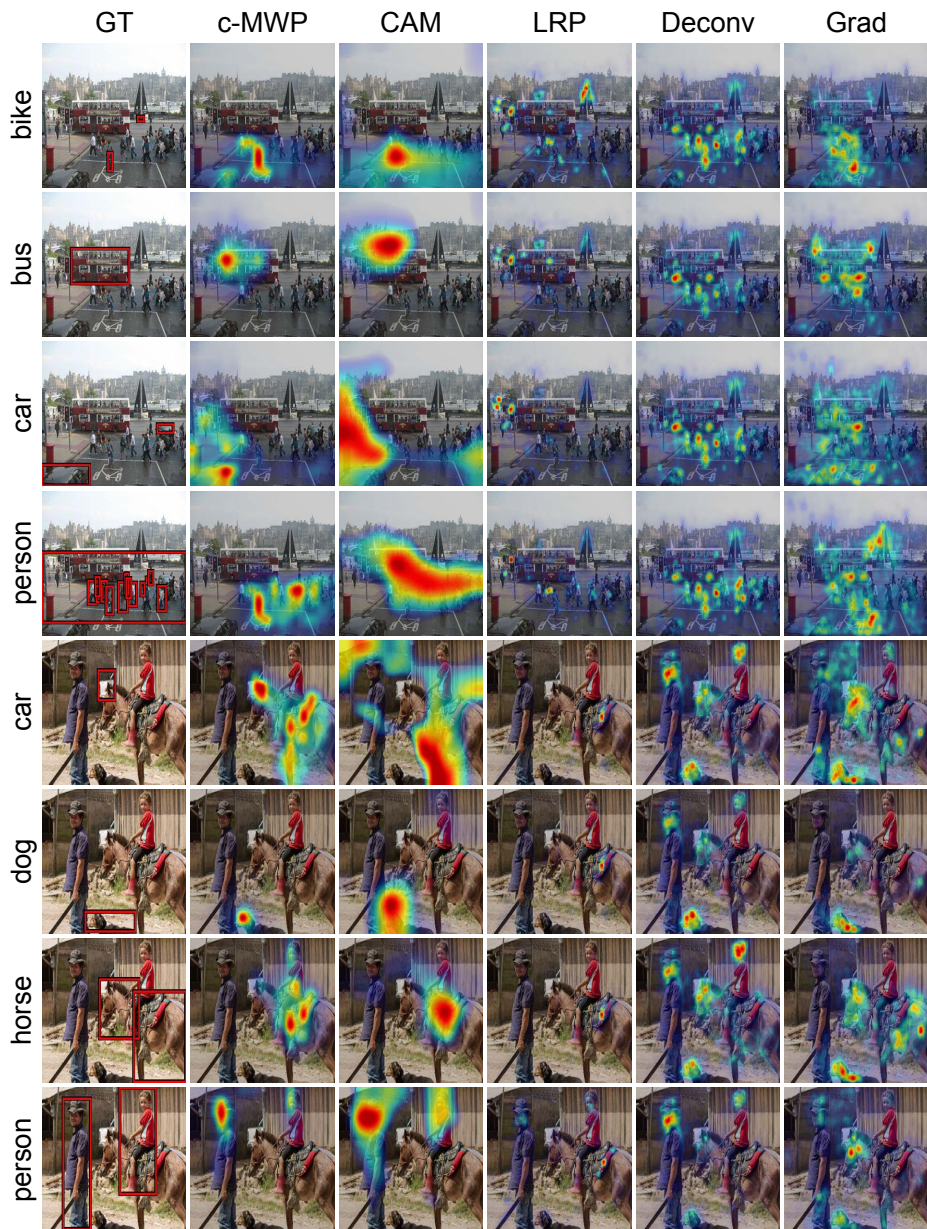

Fig. 9. Pointing Game: example attention maps using GoogleNet on COCO for c-MWP, CAM [5], LRP [6], Deconv [7] and Grad [8].

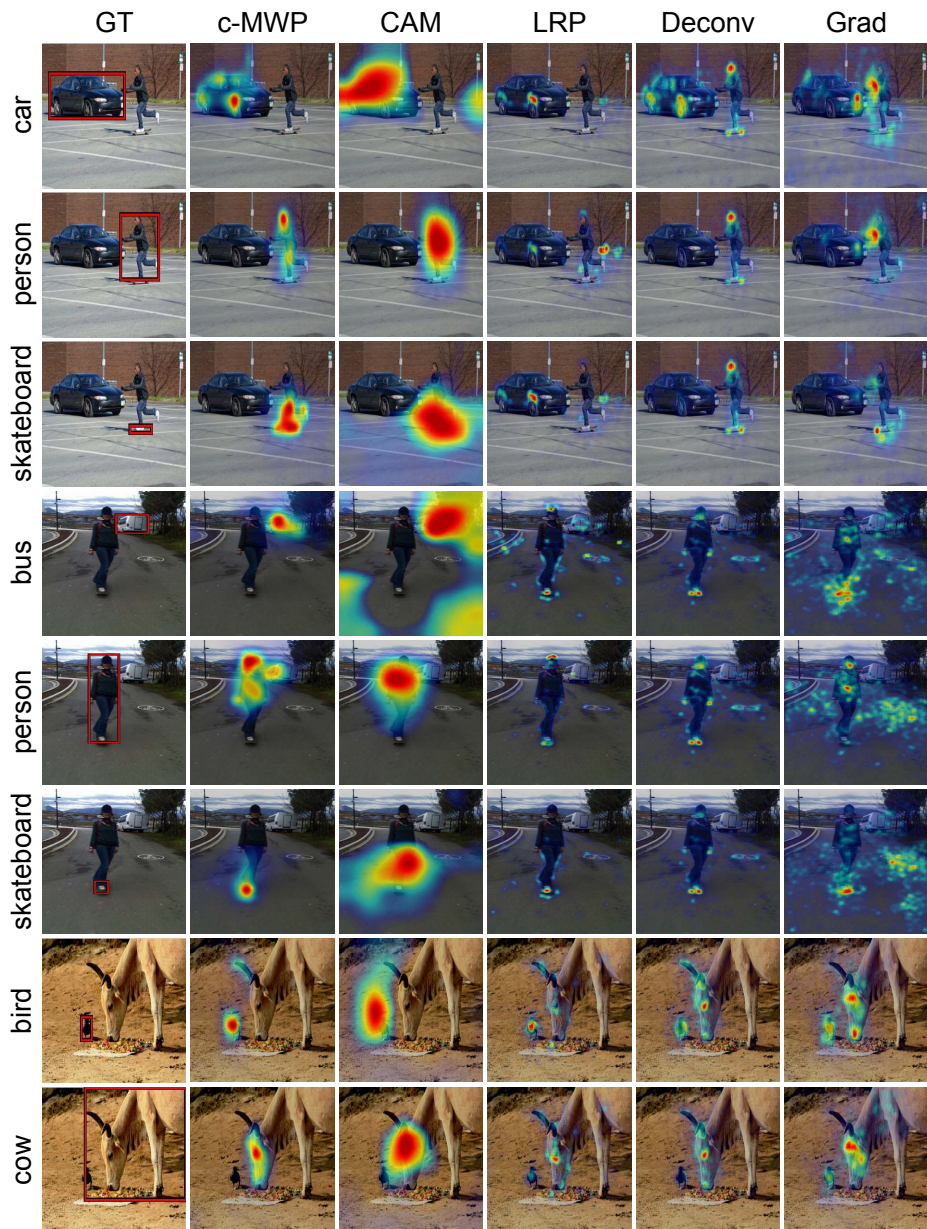

**Fig. 10.** Pointing Game: example attention maps using GoogleNet on COCO for c-MWP, CAM [5], LRP [6], Deconv [7] and Grad [8].



## 4 Text-to-Region Association

### 4.1 Details about the Stock6M Dataset

We provide more details about the Stock6M dataset used for training the image tag classifier.

**Data collection and cleaning.** We crawl an initial set of about 17M thumbnail images and their tags from a stock image website. This website provides professional photos and illustrations for commercial usage. Each image on the website has a list of tags used for text-based image search. Then we use the most frequent 18157 tags for our dictionary using a frequency threshold of 1000. Most of these tags are unigrams. We remove images with fewer than five tags. We empirically find that some images' tags are in alphabetical order, and the quality of these tags is usually poor. Thus, we remove these images, too. We further perform a duplicate detection based on tag information and user ids, since many images uploaded by the same user can be very similar. For each user id, we check the tag list of each of its images. We remove an image if its first five tags are very similar to the first five tags of a previously seen image of the same user id. The two sets of tags are considered to be similar if they have more than three overlaps. After all these steps, we end up with a dataset of about 6M images.

**Frequent Tags and Example Images.** We visualize the most frequent tags in a word cloud (Fig. 11). We can see that many frequent tags are related to humans, for example **woman**, **man**, **beautiful**, **happy**, *etc.* There are also a lot of non-visual tags like **healthy**, **business**, **holiday** and **lifestyle**. Some example images and the corresponding user tags are shown in Fig 12.

### 4.2 Example Word Attention Maps

Example word attention maps are shown in Figs. 13-17.



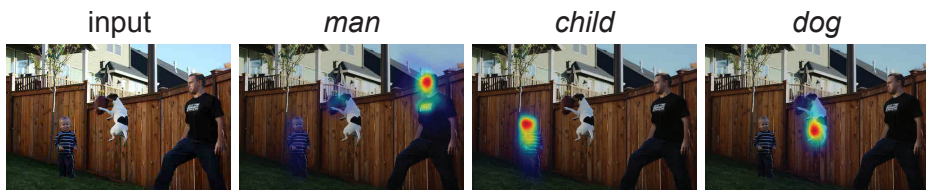

A **man** and a **child** are standing near a **dog** who is jumping.

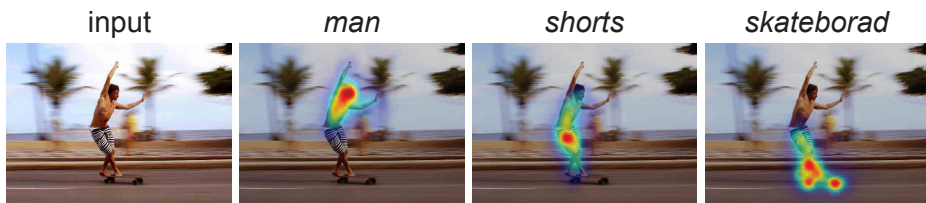

A **man** in **shorts** **skateboards** down the street.

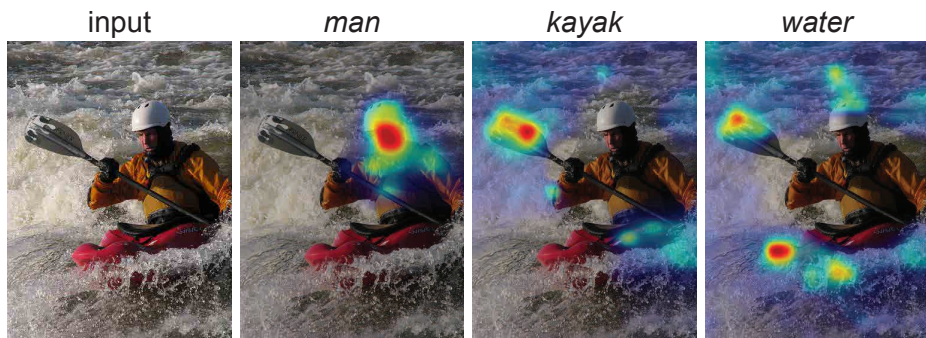

A **man** is riding a **kayak** through **water**.

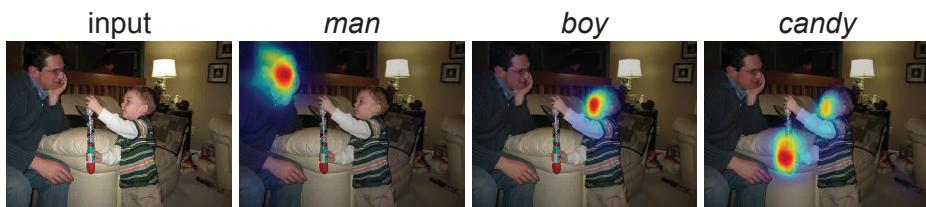

A **man** sitting on a couch and a little **boy** holding up his Christmas **candy**.

**Fig. 13.** Text-to-Region Association: word attention maps obtained by c-MWP using our image tag classifier. For each test image, one of its caption annotations from Flickr30k Entities is displayed below. We display the attention maps for the words in red in each caption.

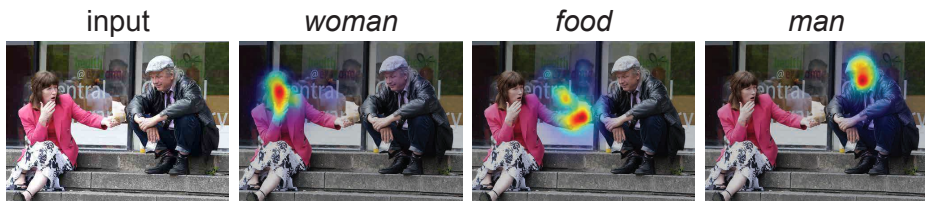

A **woman** in a red business suit sits on a step sharing **food** with a **man** in a leather jacket.

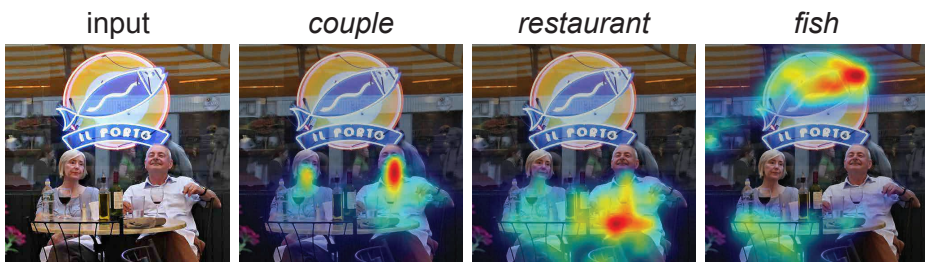

A **couple** is sitting at a **restaurant** in front of a big **fish** sign.

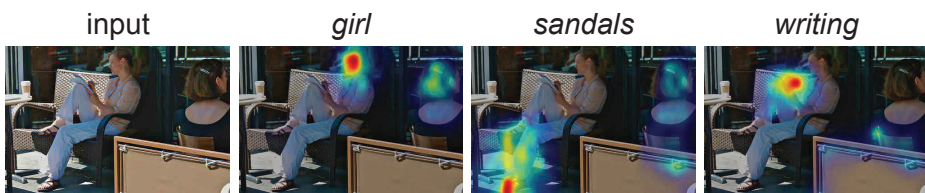

A **girl** wearing **sandals** is **writing** in a notebook while sitting in a chair outside.

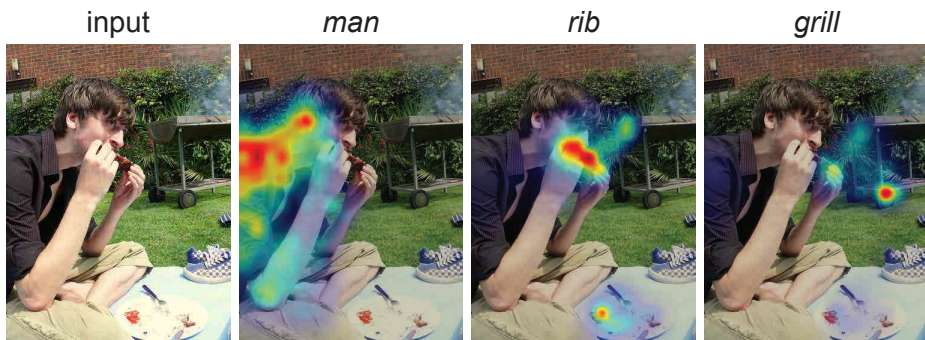

A **man** is eating barbecue **ribs** outside next to a **grill**.

**Fig. 14.** Text-to-Region Association: word attention maps obtained by c-MWP using our image tag classifier. For each test image, one of its caption annotations from Flickr30k Entities is displayed below. We display the attention maps for the words in red in each caption.



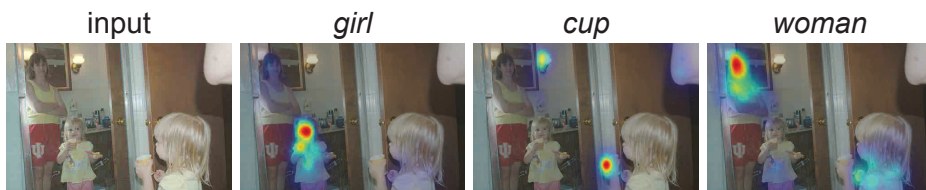

A little **girl** with blond-hair, a yellow shirt, and a yellow **cup** is looking at a mirror with a **woman** wearing a yellow shirt and red shorts behind her.

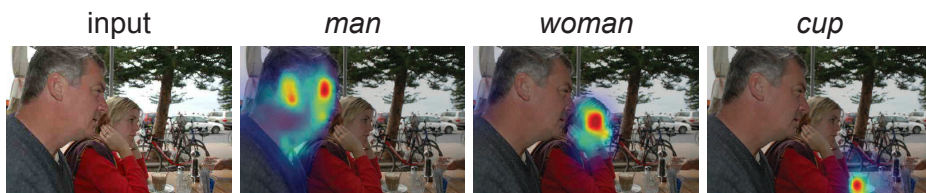

A **man** and a **woman** at a table, the woman has a **cup** with drink in front of her.

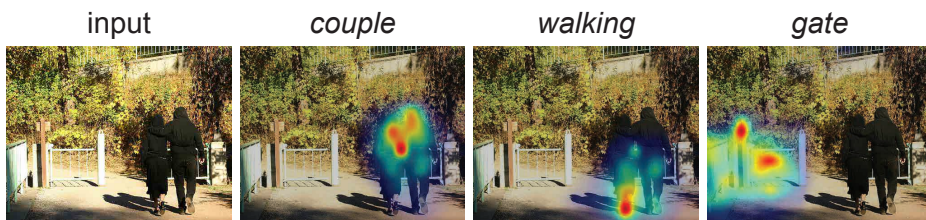

A **couple** in black clothes are **walking** towards a white **gate**.

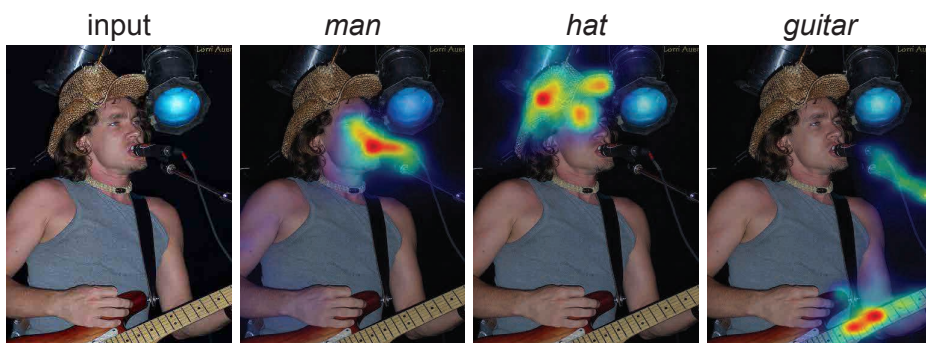

A **man** in a gray tank top and a cowboy **hat** plays the **guitar** and sings .

**Fig. 15.** Text-to-Region Association: word attention maps obtained by c-MWP using our image tag classifier. For each test image, one of its caption annotations from Flickr30k Entities is displayed below. We display the attention maps for the words in red in each caption.

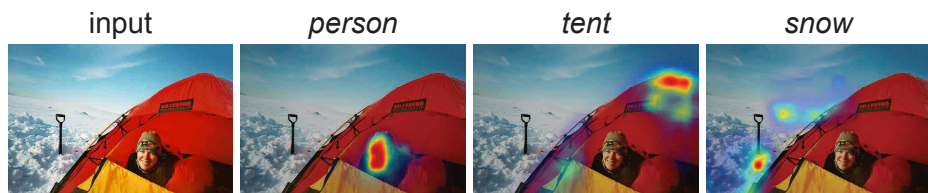

A **person** peeks out from a colorful **tent** in a vast field of **snow**.

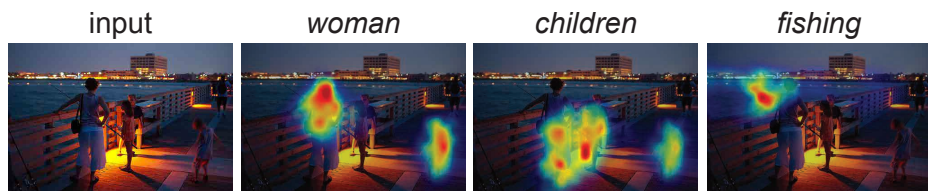

**Woman** with three **children** **fishing** over boardwalk in the evening.

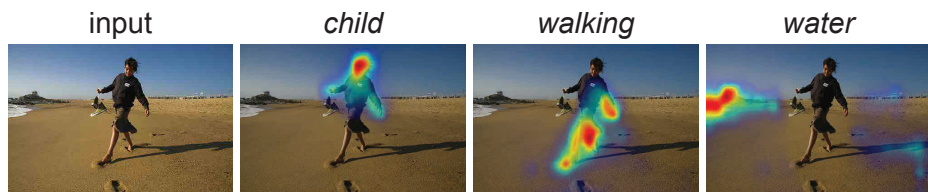

A **child** hold green shoes is **walking** in the sand by the **water**.

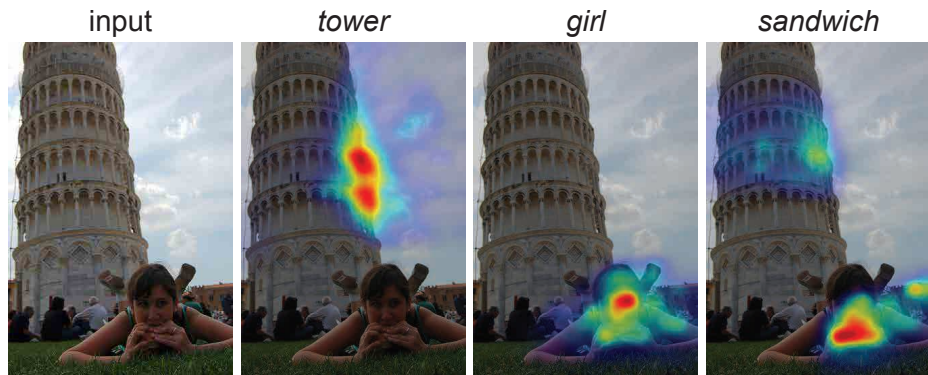

Many people are sitting outside the leaning **tower** of Piza, one **girl** dressed in green is facing the camera and eating a **sandwich**.

**Fig. 16.** Text-to-Region Association: word attention maps obtained by c-MWP using our image tag classifier. For each test image, one of its caption annotations from Flickr30k Entities is displayed below. We display the attention maps for the words in red in each caption.

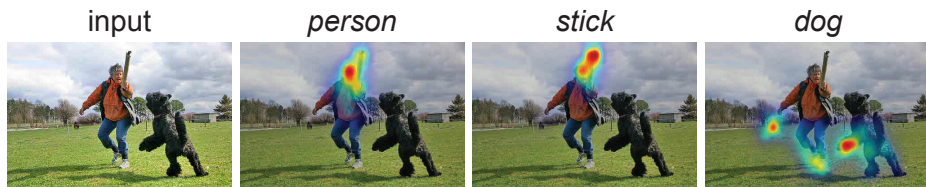

A **person** in an orange coat prepares to throw a **stick** to a **dog**.

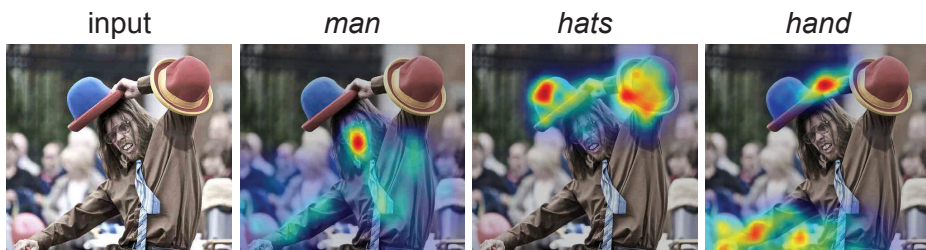

A **man** with long hair and glasses is making a silly face while holding two **hats**, one on his elbow, and one with his **hand** above his head.

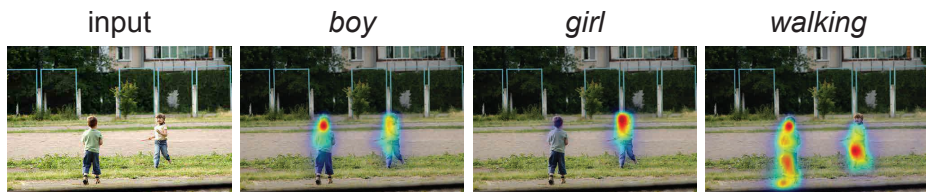

A young **boy** and a young **girl** **walking** towards each other.

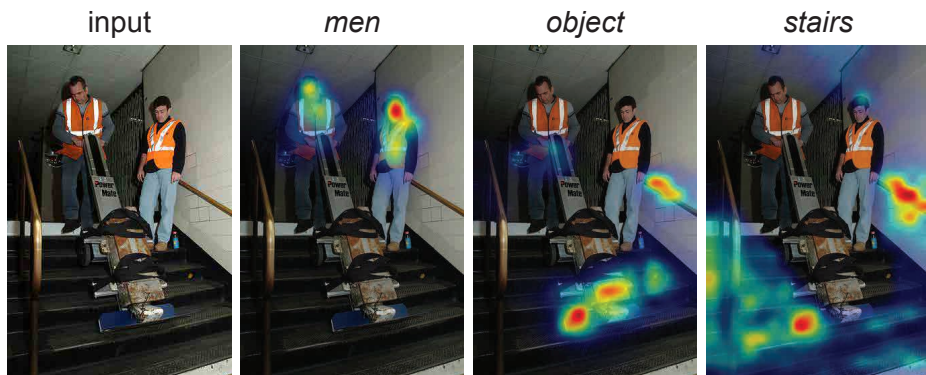

Two **men** in orange vests moving a heavy **object** down some **stairs**.

**Fig. 17.** Text-to-Region Association: word attention maps obtained by c-MWP using our image tag classifier. For each test image, one of its caption annotations from Flickr30k Entities is displayed below. We display the attention maps for the words in red in each caption.

## 5 Other Discussions

### 5.1 Effects of the Layer Selection

As we show in the paper, the effect of the layer selection on our method is quite marginal in the pointing game when the spatial resolution of the selected layer is about  $14 \times 14$  or above. We observe the same trend in the phrase localization experiment. In the phrase localization experiment, the attention maps are used to rank the object proposals. The ranking function is based on the sum of the pixel values inside a proposal, and thus is not sensitive to the spatial resolution of the selected layer.

**Table 1.** Pool2 *vs.* pool3 using **GoogLeNet** in localizing dominant objects on ImageNet.

|                | pool2 | pool3 |
|----------------|-------|-------|
| Loc. Error (%) | 38.7  | 41.2  |

However, we find that using lower level layers is more critical in the experiment of Sec. 4.2, where the object localization is based on thresholded attention maps. Attention maps of low resolution cannot clearly define the object boundaries, and thus result in less accuracy of the resultant bounding boxes. In Table 1, we compare the performance of pool2 and pool3 of the GoogLeNet model. The spatial resolution of the attention map is  $28 \times 28$  for pool2 and  $14 \times 14$  for pool3.



## References

1. Kemeny, J.G., Snell, J.L., et al.: Finite Markov chains. New York Berlin Heidelberg Tokyo: Springer-Verlag (1960)
2. Lin, T.Y., Maire, M., Belongie, S., Hays, J., Perona, P., Ramanan, D., Dollár, P., Zitnick, C.L.: Microsoft COCO: Common objects in context. In: ECCV. (2014)
3. Everingham, M., Van Gool, L., Williams, C.K.I., Winn, J., Zisserman, A.: The pascal visual object classes (VOC) challenge. *International Journal of Computer Vision* **88**(2) (June 2010) 303–338
4. Oquab, M., Bottou, L., Laptev, I., Sivic, J.: Is object localization for free?-weakly-supervised learning with convolutional neural networks. In: CVPR. (2015)
5. Zhou, B., Lapedriza, A., Xiao, J., Torralba, A., Oliva, A.: Learning deep features for scene recognition using places database. In: NIPS. (2014)
6. Bach, S., Binder, A., Montavon, G., Klauschen, F., Müller, K.R., Samek, W.: On pixel-wise explanations for non-linear classifier decisions by layer-wise relevance propagation. *PloS One* **10**(7) (2015) e0130140
7. Zeiler, M.D., Fergus, R.: Visualizing and understanding convolutional networks. In: ECCV. (2014)
8. Simonyan, K., Vedaldi, A., Zisserman, A.: Deep inside convolutional networks: Visualising image classification models and saliency maps. In: ICLR Workshop. (2014)
